# Supplementary material for: CAF-derived miR-642a-3p supports migration, invasion, and EMT of hepatocellular carcinoma cells by targeting SERPINE1
Source: PeerJ journal article supplement (doi:10.7717/peerj.18428), 2024-11-11
Supplement: Raw_data_in_Figure_3E.zip [file Raw_data_in_Figure_3E.zip]

## Sheet: analysis of gray
				Huh7+mimics NC	Huh7+miran mimics	Huh7+inhibitors NC	Huh7+mirna inhibitors	Huh7+mimics NC	Huh7+miran mimics	Huh7+inhibitors NC	Huh7+mirna inhibitors	Huh7+mimics NC	Huh7+miran mimics	Huh7+inhibitors NC	Huh7+mirna inhibitors
			serpine1	934.65	314.45	969.05	1531.4	1005.7	421.4	1210.4	1861.4	1038	426.96	846.75	1597.2
			E-cadherin	2334.1	1211.3	1844.2	2647.3	1607.7	771.96	1658.4	2574.7	2283.3	1614.7	2303.4	3050.3
			N-cadherin	963.55	1848.5	867.61	354.31	989.53	1842.3	967.26	369.71	1059.4	1970	1008.4	524.35
			Vimentin	933.93	1621.6	1012.7	467.21	1049.6	1644.9	1213.3	604.3	1322.9	1608.4	1376.8	778.3
			GAPDH	5354.24	5623.44	5398.16	5227.28	5334.08	5369.76	5100.32	4860.32	5122.56	5103.68	5191.36	5369.28
			group	Huh7+mimics NC	Huh7+miran mimics	Huh7+inhibitors NC	Huh7+mirna inhibitors	Huh7+mimics NC	Huh7+miran mimics	Huh7+inhibitors NC	Huh7+mirna inhibitors	Huh7+mimics NC	Huh7+miran mimics	Huh7+inhibitors NC	Huh7+mirna inhibitors
			serpine1/GAPDH	0.174563	0.0559177	0.179515	0.292963	0.188542	0.0784765	0.237318	0.382979	0.202633	0.0836573	0.163108	0.29747
			E-cadherin/GAPDH	0.435935	0.215402	0.341635	0.506439	0.301402	0.143761	0.325156	0.529739	0.445734	0.31638	0.443699	0.568102
			N-cadherin/GAPDH	0.17996	0.328713	0.160723	0.0677809	0.185511	0.343088	0.189647	0.076067	0.206811	0.385996	0.194246	0.0976574
			Vimentin/GAPDH	0.174428	0.288364	0.187601	0.0893792	0.196772	0.306327	0.237887	0.124333	0.25825	0.315145	0.26521	0.144954
