# Supplementary material for: CAF-derived miR-642a-3p supports migration, invasion, and EMT of hepatocellular carcinoma cells by targeting SERPINE1
Source: PeerJ journal article supplement (doi:10.7717/peerj.18428), 2024-11-11
Supplement: Raw_data_in_Figure_4D.zip [file Raw_data_in_Figure_4D.zip]

## Sheet: analysis of gray
		Huh7-1	Huh7+inhibitor-1	Huh7+inhibitor+ si-SERPINE1-1	Huh7-2	Huh7+inhibitor-2	Huh7+inhibitor+ si-SERPINE1-2	Huh7-3	Huh7+inhibitor-3	Huh7+inhibitor+ si-SERPINE1-3
	E-cadherin	480.21	2423.2	1339.3	664.63	2176.7	1305.7	813.35	2555	1651.9
	N-cadherin	3247.8	877.82	2118.1	2894.4	744.2	1941.2	3652.1	753.34	1933
	SERPINE1	1751.4	2386.9	532.06	1624.5	2598.8	542.6	1799.3	2868.8	971.48
	vimentin	2607.5	253.42	1496.3	2422.8	361.71	1049.3	2144	292.99	1241.3
	GAPDH	3674.3	3477.6	3440.1	3625.8	3452.3	3412	3344.1	3183.3	3081.5
	group	Huh7-1	Huh7+inhibitor-1	Huh7+inhibitor+ si-SERPINE1-1	Huh7-2	Huh7+inhibitor-2	Huh7+inhibitor+ si-SERPINE1-2	Huh7-3	Huh7+inhibitor-3	Huh7+inhibitor+ si-SERPINE1-3
	E-cadherin /GAPDH	0.130694	0.696802	0.38932	0.183306	0.630507	0.382679	0.243219	0.802626	0.53607
	N-cadherin/GAPDH	0.883923	0.252421	0.615709	0.798279	0.215566	0.568933	1.0921	0.236654	0.627292
	SERPINE1 /GAPDH	0.476662	0.686364	0.154664	0.448039	0.752774	0.159027	0.538052	0.901203	0.315262
	vimentin/GAPDH	0.709659	0.0728721	0.434958	0.668211	0.104774	0.307532	0.641129	0.0920397	0.402823
