# Supplementary material for: CAF-derived miR-642a-3p supports migration, invasion, and EMT of hepatocellular carcinoma cells by targeting SERPINE1
Source: PeerJ journal article supplement (doi:10.7717/peerj.18428), 2024-11-11
Supplement: Raw_data_in_Figure_5F.zip [file Raw_data_in_Figure_5F.zip]

## Sheet: analysis of gray
		AAV-NC-1	AAV-miRNA -1	AAV-NC-2	AAV-miRNA -2	AAV-NC-3	AAV-miRNA -3	AAV-NC-4	AAV-miRNA -4	AAV-NC-5	AAV-miRNA -5
	SERPINE1	1591.1	2360.2	1395.2	2504.2	1620.8	2667.4	1644.9	2636.5	1611.6	3026.6
	E-cadherin	1844.2	2860.6	1550.2	2898.6	1656.1	2541.7	1794.2	2551.2	1492.5	2270.7
	Vimentin	2831.4	1539.2	2972.5	1838.6	3079.5	1615.4	2744.5	1475.8	2626.1	1207.1
	N-cadherin	1750.3	874.53	1790.7	816.32	1642.1	722.16	1813.5	900.07	2101	755.57
	GAPDH	4892.6	4501.9	4969.8	4915	4873.1	5004.7	4633.3	4749.7	5052.3	4919
	group	AAV-NC-1	AAV-miRNA -1	AAV-NC-2	AAV-miRNA -2	AAV-NC-3	AAV-miRNA -3	AAV-NC-4	AAV-miRNA -4	AAV-NC-5	AAV-miRNA -5
	SERPINE1/GAPDH	0.325205	0.524268	0.280736	0.509502	0.332601	0.532979	0.355017	0.555088	0.318983	0.615288
	E-cadherin/GAPDH	0.376937	0.635421	0.311924	0.589746	0.339845	0.507863	0.38724	0.537129	0.29541	0.461618
	Vimentin/GAPDH	0.578711	0.3419	0.598113	0.374079	0.631939	0.322777	0.592342	0.310714	0.519783	0.245395
	N-cadherin/GAPDH	0.357744	0.194258	0.360316	0.166087	0.336972	0.144296	0.391406	0.1895	0.41585	0.153602
