# Supplementary material for: CAF-derived miR-642a-3p supports migration, invasion, and EMT of hepatocellular carcinoma cells by targeting SERPINE1
Source: PeerJ. 2024 Nov 11;12:e18428. doi: 10.7717/peerj.18428 (PMC11562775; doi:10.7717/peerj.18428)
Supplement: Supplemental Information 2 [file peerj-12-18428-s002.xls]

## Sheet: Sheet1
ITEM TO CHECK	IMPORTANCE	CHECKLIST
EXPERIMENTAL DESIGN
Definition of experimental and control groups	E	Line 142-143, 149-151, 215-216
Number within each group	E	Line 151, 215-216， 616-617
Assay carried out by core lab or investigator's lab?	D	NA
Acknowledgement of authors' contributions	D	Ø
SAMPLE
Description	E	Line 117
Volume/mass of sample processed	D	Line 117
Microdissection or macrodissection	E	Line 225-226
Processing procedure	E	Line 226-227
If frozen - how and how quickly?	E	Line 226-227
If fixed - with what, how quickly?	E	NA
Sample storage conditions and duration (especially for FFPE samples)	E	Line 226-227
NUCLEIC ACID EXTRACTION
Procedure and/or instrumentation	E	Line 177-183
Name of kit and details of any modifications	E	Line 177-183
Source of additional reagents used	D	Line 177-183
Details of DNase or RNAse treatment	E	Line 177-181
Contamination assessment (DNA or RNA)	E	Line 177-179
Nucleic acid quantification	E	Line 178-179
Instrument and method	E	Line 178-179
Purity (A260/A280)	D	OK
Yield	D	Line 178-179
RNA integrity method/instrument	E	Line 177-179
RIN/RQI or Cq of 3' and 5' transcripts	E	SM
Electrophoresis traces	D	Ø
Inhibition testing (Cq dilutions, spike or other)	E	Ø
REVERSE TRANSCRIPTION
Complete reaction conditions	E	SM
Amount of RNA and reaction volume	E	SM
Priming oligonucleotide (if using GSP) and concentration	E	SM
Reverse transcriptase and concentration	E	SM
Temperature and time	E	SM
Manufacturer of reagents and catalogue numbers	D	Line 179-181
Cqs with and without RT	D*	OK
Storage conditions of cDNA	D	SM
qPCR TARGET INFORMATION
If multiplex, efficiency and LOD of each assay.	E	Line 182-184
Sequence accession number	E	Line 186
Location of amplicon	D	Ø
Amplicon length	E	Line 186
In silico specificity screen (BLAST, etc)	E	SM
Pseudogenes, retropseudogenes or other homologs?	D	NA
Sequence alignment	D	Ø
Secondary structure analysis of amplicon	D	Ø
Location of each primer by exon or intron (if applicable)	E	NA
What splice variants are targeted?	E	NA
qPCR OLIGONUCLEOTIDES
Primer sequences	E	Line 186
RTPrimerDB Identification Number	D	NA
Probe sequences	D**	NA
Location and identity of any modifications	E	NA
Manufacturer of oligonucleotides	D	Line 186
Purification method	D	Ø
qPCR PROTOCOL
Complete reaction conditions	E	SM
Reaction volume and amount of cDNA/DNA	E	SM
Primer, (probe), Mg++ and dNTP concentrations	E	SM
Polymerase identity and concentration	E	SM
Buffer/kit identity and manufacturer	E	SM
Exact chemical constitution of the buffer	D	Ø
Additives (SYBR Green I, DMSO, etc.)	E	Line 182-183
Manufacturer of plates/tubes and catalog number	D	SM
Complete thermocycling parameters	E	SM
Reaction setup (manual/robotic)	D	SM
Manufacturer of qPCR instrument	E	Line 183
qPCR VALIDATION
Evidence of optimisation (from gradients)	D	OK
	E	SM
For SYBR Green I, Cq of the NTC	E	SM
Standard curves with slope and y-intercept	E	SM
PCR efficiency calculated from slope	E	SM
Confidence interval for PCR efficiency or standard error	D	Ø
r2 of standard curve	E	SM
Linear dynamic range	E	Ø
Cq variation at lower limit	E	NA
Confidence intervals throughout range	D	NA
Evidence for limit of detection	E	NA
If multiplex, efficiency and LOD of each assay.	E	NA
DATA ANALYSIS
qPCR analysis program (source, version)	E	SM
Cq method determination	E	SM
Outlier identification and disposition	E	SM
Results of NTCs	E	SM
Justification of number and choice of reference genes	E	Line 182
Description of normalisation method	E	Line 183-184
Number and concordance of biological replicates	D	Line 184
Number and stage (RT or qPCR) of technical replicates	E	Line 184
Repeatability (intra-assay variation)	E	Ø
Reproducibility (inter-assay variation, %CV)	D	Ø
Power analysis	D	Ø
Statistical methods for result significance	E	Line 246-249
Software (source, version)	E	Line 245
Cq or raw data submission using RDML	D	SM
Table 1. MIQE checklist for authors, reviewers and editors. All essential information (E) must be submitted with the manuscript. Desirable
information (D) should be submitted if available. If using primers obtained from RTPrimerDB, information on qPCR target, oligonucleotides,
protocols and validation is available from that source.
*: Assessing the absence of DNA using a no RT assay is essential when first extracting RNA. Once the sample has been validated as
RDNA-free, inclusion of a no-RT control is desirable, but no longer essential.
**: Disclosure of the probe sequence is highly desirable and strongly encouraged. However, since not all commercial pre-designed assay
vendors provide this information, it cannot be an essential requirement. Use of such assays is advised against.
NA Not applicable.
OK Test was performed but evidence is missing
Ø Information is not available
SM Information is provided in Supplementary Materials
