# Supplementary material for: CAF-derived miR-642a-3p supports migration, invasion, and EMT of hepatocellular carcinoma cells by targeting SERPINE1
Source: PeerJ. 2024 Nov 11;12:e18428. doi: 10.7717/peerj.18428 (PMC11562775; doi:10.7717/peerj.18428)
Supplement: Supplemental Information 3 [file peerj-12-18428-s003.xls]

## Sheet: SERPINE1
							11.93
Sample Name	Target Name	Task	Reporter	Quencher	Cт	GAPDH mean（ct）	ΔCT	ΔΔCT	minus ΔΔCT	2-ΔΔCT	2-ΔΔCT Mean	Ct SD
HUH7	SERPINE1	UNKNOWN	SYBR	None	28.5708		11.93	-6.45955e-05	6.45955e-05	1.00004	1.00203	0.078204		1	0.08	±	1±0.08
HUH7	SERPINE1	UNKNOWN	SYBR	None	28.6836		12.0427	0.112717	-0.112717	0.924844
HUH7	SERPINE1	UNKNOWN	SYBR	None	28.4583		11.8174	-0.112653	0.112653	1.08121
HUH7	GAPDH	UNKNOWN	SYBR	None	16.5178	16.6409
HUH7	GAPDH	UNKNOWN	SYBR	None	16.7872
HUH7	GAPDH	UNKNOWN	SYBR	None	16.6177
CAF/Huh7	SERPINE1	UNKNOWN	SYBR	None	29.4426		12.571	0.641	-0.641	0.641268	0.624385	0.0278059		0.62	0.03	±	0.62±0.03
CAF/Huh7	SERPINE1	UNKNOWN	SYBR	None	29.4464		12.5748	0.644772	-0.644772	0.639594
CAF/Huh7	SERPINE1	UNKNOWN	SYBR	None	29.5572		12.6856	0.75562	-0.75562	0.592292
CAF/Huh7	GAPDH	UNKNOWN	SYBR	None	16.8769	16.8716
CAF/Huh7	GAPDH	UNKNOWN	SYBR	None	16.8046
CAF/Huh7	GAPDH	UNKNOWN	SYBR	None	16.9333
