# Supplementary material for: CAF-derived miR-642a-3p supports migration, invasion, and EMT of hepatocellular carcinoma cells by targeting SERPINE1
Source: PeerJ. 2024 Nov 11;12:e18428. doi: 10.7717/peerj.18428 (PMC11562775; doi:10.7717/peerj.18428)
Supplement: Supplemental Information 4 [file peerj-12-18428-s004.xls]

## Sheet: SERPINE1
							4.70607
Sample Name	Target Name	Task	Reporter	Quencher	Cт	GAPDH mean（ct）	ΔCT	ΔΔCT	minus ΔΔCT	2-ΔΔCT	2-ΔΔCT Mean	Ct SD
huh7 con	SERPINE1	UNKNOWN	SYBR	None	23.7418		4.67215	-0.0339171	0.0339171	1.02379	1.00176	0.0720077		1	0.07	±	1±0.07
huh7 con	SERPINE1	UNKNOWN	SYBR	None	23.894		4.8243	0.118234	-0.118234	0.921315
huh7 con	SERPINE1	UNKNOWN	SYBR	None	23.6914		4.62175	-0.0843169	0.0843169	1.06019
huh7 con	GAPDH	UNKNOWN	SYBR	None	19.1284	19.0697
huh7 con	GAPDH	UNKNOWN	SYBR	None	19.0022
huh7 con	GAPDH	UNKNOWN	SYBR	None	19.0784
huh7 si-nc	SERPINE1	UNKNOWN	SYBR	None	24.4899		4.88521	0.179145	-0.179145	0.883227	0.990176	0.109444		0.99	0.11	±	0.99±0.11
huh7 si-nc	SERPINE1	UNKNOWN	SYBR	None	24.1707		4.566	-0.140066	0.140066	1.10196
huh7 si-nc	SERPINE1	UNKNOWN	SYBR	None	24.3321		4.72737	0.0212992	-0.0212992	0.985345
huh7 si-nc	GAPDH	UNKNOWN	SYBR	None	19.6262	19.6047
huh7 si-nc	GAPDH	UNKNOWN	SYBR	None	19.7554
huh7 si-nc	GAPDH	UNKNOWN	SYBR	None	19.4326
huh7 si-1	SERPINE1	UNKNOWN	SYBR	None	25.9487		5.8495	1.14343	-1.14343	0.452682	0.469549	0.0149032		0.47	0.01	±	0.47±0.01
huh7 si-1	SERPINE1	UNKNOWN	SYBR	None	25.8613		5.76215	1.05608	-1.05608	0.480937
huh7 si-1	SERPINE1	UNKNOWN	SYBR	None	25.8792		5.77998	1.07392	-1.07392	0.475028
huh7 si-1	GAPDH	UNKNOWN	SYBR	None	20.0318	20.0992
huh7 si-1	GAPDH	UNKNOWN	SYBR	None	20.3354
huh7 si-1	GAPDH	UNKNOWN	SYBR	None	19.9303
huh7 si-2	SERPINE1	UNKNOWN	SYBR	None	25.7148		7.59253	2.88646	-2.88646	0.135235	0.142535	0.00822278		0.14	0.01	±	0.14±0.01
huh7 si-2	SERPINE1	UNKNOWN	SYBR	None	25.5514		7.42922	2.72315	-2.72315	0.151443
huh7 si-2	SERPINE1	UNKNOWN	SYBR	None	25.6553		7.53305	2.82699	-2.82699	0.140926
huh7 si-2	GAPDH	UNKNOWN	SYBR	None	18.1052	18.1222
huh7 si-2	GAPDH	UNKNOWN	SYBR	None	18.1201
huh7 si-2	GAPDH	UNKNOWN	SYBR	None	18.1414
huh7 si-3	SERPINE1	UNKNOWN	SYBR	None	25.7974		6.04175	1.33568	-1.33568	0.396205	0.381214	0.0129896		0.38	0.01	±	0.38±0.01
huh7 si-3	SERPINE1	UNKNOWN	SYBR	None	25.8801		6.1244	1.41834	-1.41834	0.374143
huh7 si-3	SERPINE1	UNKNOWN	SYBR	None	25.8834		6.12769	1.42162	-1.42162	0.373293
huh7 si-3	GAPDH	UNKNOWN	SYBR	None	19.8615	19.7557
huh7 si-3	GAPDH	UNKNOWN	SYBR	None	19.7567
huh7 si-3	GAPDH	UNKNOWN	SYBR	None	19.6488
