# Supplementary material for: CAF-derived miR-642a-3p supports migration, invasion, and EMT of hepatocellular carcinoma cells by targeting SERPINE1
Source: PeerJ. 2024 Nov 11;12:e18428. doi: 10.7717/peerj.18428 (PMC11562775; doi:10.7717/peerj.18428)
Supplement: Supplemental Information 5 [file peerj-12-18428-s005.xls]

## Sheet: Figure 2B
							18.6032
Sample Name	Target Name	Task	Reporter	Quencher	Cт	GAPDH mean（ct）	ΔCT	ΔΔCT	minus ΔΔCT	2-ΔΔCT	2-ΔΔCT Mean	Ct SD
HUH7	miR-642a-3p	UNKNOWN	SYBR	None	38.9723		18.6927	0.0895429	-0.0895429	0.93982	1.0027	0.0915854		1	0.09	±	1±0.09
HUH7	miR-642a-3p	UNKNOWN	SYBR	None	38.9409		18.6613	0.0581289	-0.0581289	0.960509
HUH7	miR-642a-3p	UNKNOWN	SYBR	None	38.7351		18.4555	-0.147672	0.147672	1.10778
HUH7	U6	UNKNOWN	SYBR	None	20.6728	20.2795
HUH7	U6	UNKNOWN	SYBR	None	19.9161
HUH7	U6	UNKNOWN	SYBR	None	20.2497
CAF/Huh7	miR-642a-3p	UNKNOWN	SYBR	None	37.0325		17.0769	-1.52635	1.52635	2.88056	2.8759	0.373407		2.88	0.37	±	2.88±0.37
CAF/Huh7	miR-642a-3p	UNKNOWN	SYBR	None	36.8598		16.9041	-1.69909	1.69909	3.24695
CAF/Huh7	miR-642a-3p	UNKNOWN	SYBR	None	37.2368		17.2812	-1.32203	1.32203	2.50018
CAF/Huh7	U6	UNKNOWN	SYBR	None	19.814	19.9557
CAF/Huh7	U6	UNKNOWN	SYBR	None	20.0328
CAF/Huh7	U6	UNKNOWN	SYBR	None	20.0202

## Sheet: Figure 2C
							13.1547
Sample Name	Target Name	Task	Reporter	Quencher	Cт	GAPDH mean（ct）	ΔCT	ΔΔCT	minus ΔΔCT	2-ΔΔCT	2-ΔΔCT Mean	Ct SD
HUH7	miR-544b	UNKNOWN	SYBR	None	33.4854		13.2058	0.0510763	-0.0510763	0.965216	1.0009	0.0524635		1	0.05	±	1±0.05
HUH7	miR-544b	UNKNOWN	SYBR	None	33.3487		13.0691	-0.085612	0.085612	1.06114
HUH7	miR-544b	UNKNOWN	SYBR	None	33.4688		13.1893	0.0345357	-0.0345357	0.976346
HUH7	U6	UNKNOWN	SYBR	None	20.6728	20.2795
HUH7	U6	UNKNOWN	SYBR	None	19.9161
HUH7	U6	UNKNOWN	SYBR	None	20.2497
CAF/Huh7	miR-544b	UNKNOWN	SYBR	None	32.9167		12.961	-0.193701	0.193701	1.14369	1.1028	0.0838864		1.1	0.08	±	1.1±0.08
CAF/Huh7	miR-544b	UNKNOWN	SYBR	None	32.8983		12.9426	-0.21213	0.21213	1.1584
CAF/Huh7	miR-544b	UNKNOWN	SYBR	None	33.1013		13.1457	-0.00907389	0.00907389	1.00631
CAF/Huh7	U6	UNKNOWN	SYBR	None	19.814	19.9557
CAF/Huh7	U6	UNKNOWN	SYBR	None	20.0328
CAF/Huh7	U6	UNKNOWN	SYBR	None	20.0202

## Sheet: Figure 2D
							11.6559
Sample Name	Target Name	Task	Reporter	Quencher	Cт	GAPDH mean（ct）	ΔCT	ΔΔCT	minus ΔΔCT	2-ΔΔCT	2-ΔΔCT Mean	Ct SD
HUH7	miR-3135a	UNKNOWN	SYBR	None	31.8343		11.5548	-0.101159	0.101159	1.07263	1.00142	0.0655834		1	0.07	±	1±0.07
HUH7	miR-3135a	UNKNOWN	SYBR	None	31.9528		11.6732	0.0172704	-0.0172704	0.9881
HUH7	miR-3135a	UNKNOWN	SYBR	None	32.0194		11.7398	0.0838884	-0.0838884	0.943511
HUH7	U6	UNKNOWN	SYBR	None	20.6728	20.2795
HUH7	U6	UNKNOWN	SYBR	None	19.9161
HUH7	U6	UNKNOWN	SYBR	None	20.2497
CAF/Huh7	miR-3135a	UNKNOWN	SYBR	None	30.4318		10.4761	-1.17983	1.17983	2.26551	2.13085	0.139019		2.13	0.14	±	2.13±0.14
CAF/Huh7	miR-3135a	UNKNOWN	SYBR	None	30.5145		10.5589	-1.09707	1.09707	2.1392
CAF/Huh7	miR-3135a	UNKNOWN	SYBR	None	30.6204		10.6647	-0.991206	0.991206	1.98785
CAF/Huh7	U6	UNKNOWN	SYBR	None	19.814	19.9557
CAF/Huh7	U6	UNKNOWN	SYBR	None	20.0328
CAF/Huh7	U6	UNKNOWN	SYBR	None	20.0202

## Sheet: Figure 2E
							18.102
Sample Name	Target Name	Task	Reporter	Quencher	Cт	GAPDH mean（ct）	ΔCT	ΔΔCT	minus ΔΔCT	2-ΔΔCT	2-ΔΔCT Mean	Ct SD
HUH7	miR-449b-5p	UNKNOWN	SYBR	None	38.3393		18.0598	-0.0422592	0.0422592	1.02973	1.00068	0.0446748		1	0.04	±	1±0.04
HUH7	miR-449b-5p	UNKNOWN	SYBR	None	38.4567		18.1772	0.0751648	-0.0751648	0.949234
HUH7	miR-449b-5p	UNKNOWN	SYBR	None	38.3487		18.0691	-0.0329056	0.0329056	1.02307
HUH7	U6	UNKNOWN	SYBR	None	20.6728	20.2795
HUH7	U6	UNKNOWN	SYBR	None	19.9161
HUH7	U6	UNKNOWN	SYBR	None	20.2497
CAF/Huh7	miR-449b-5p	UNKNOWN	SYBR	None	38.241		18.2853	0.183267	-0.183267	0.880706	0.802894	0.0723814		0.8	0.07	±	0.8±0.07
CAF/Huh7	miR-449b-5p	UNKNOWN	SYBR	None	38.4968		18.5412	0.439152	-0.439152	0.737568
CAF/Huh7	miR-449b-5p	UNKNOWN	SYBR	None	38.397		18.4414	0.339333	-0.339333	0.790407
CAF/Huh7	U6	UNKNOWN	SYBR	None	19.814	19.9557
CAF/Huh7	U6	UNKNOWN	SYBR	None	20.0328
CAF/Huh7	U6	UNKNOWN	SYBR	None	20.0202

## Sheet: Figure 2F
							16.0365
Sample Name	Target Name	Task	Reporter	Quencher	Cт	GAPDH mean（ct）	ΔCT	ΔΔCT	minus ΔΔCT	2-ΔΔCT	2-ΔΔCT Mean	Ct SD
HUH7	miR-2116-3p	UNKNOWN	SYBR	None	36.1048		15.8252	-0.211307	0.211307	1.15774	1.00627	0.139105		1.01	0.14	±	1.01±0.14
HUH7	miR-2116-3p	UNKNOWN	SYBR	None	36.3499		16.0703	0.0338153	-0.0338153	0.976834
HUH7	miR-2116-3p	UNKNOWN	SYBR	None	36.4936		16.214	0.177492	-0.177492	0.884239
HUH7	U6	UNKNOWN	SYBR	None	20.6728	20.2795
HUH7	U6	UNKNOWN	SYBR	None	19.9161
HUH7	U6	UNKNOWN	SYBR	None	20.2497
CAF/Huh7	miR-2116-3p	UNKNOWN	SYBR	None	35.8939		15.9383	-0.098277	0.098277	1.07049	1.22811	0.167076		1.23	0.17	±	1.23±0.17
CAF/Huh7	miR-2116-3p	UNKNOWN	SYBR	None	35.7165		15.7608	-0.275699	0.275699	1.21058
CAF/Huh7	miR-2116-3p	UNKNOWN	SYBR	None	35.5034		15.5477	-0.488785	0.488785	1.40326
CAF/Huh7	U6	UNKNOWN	SYBR	None	19.814	19.9557
CAF/Huh7	U6	UNKNOWN	SYBR	None	20.0328
CAF/Huh7	U6	UNKNOWN	SYBR	None	20.0202
