# Supplementary material for: CAF-derived miR-642a-3p supports migration, invasion, and EMT of hepatocellular carcinoma cells by targeting SERPINE1
Source: PeerJ. 2024 Nov 11;12:e18428. doi: 10.7717/peerj.18428 (PMC11562775; doi:10.7717/peerj.18428)
Supplement: Supplemental Information 6 [file peerj-12-18428-s006.xls]

## Sheet: mir-3135a
							9.53326
Sample Name	Target Name	Task	Reporter	Quencher	Cт	GAPDH mean（ct）	ΔCT	ΔΔCT	minus ΔΔCT	2-ΔΔCT	2-ΔΔCT Mean	Ct SD
HUH7-SI-NC	mir-3135a	UNKNOWN	SYBR	None	30.433		9.47039	-0.0628681	0.0628681	1.04454	1.00097	0.053451		1	0.05	±	1±0.05
HUH7-SI-NC	mir-3135a	UNKNOWN	SYBR	None	30.5831		9.6205	0.087236	-0.087236	0.941324
HUH7-SI-NC	mir-3135a	UNKNOWN	SYBR	None	30.4715		9.50889	-0.0243679	0.0243679	1.01703
HUH7-SI-NC	U6	UNKNOWN	SYBR	None	20.615	20.9626
HUH7-SI-NC	U6	UNKNOWN	SYBR	None	21.0816
HUH7-SI-NC	U6	UNKNOWN	SYBR	None	21.1912
HUH7-SI-2	mir-3135a	UNKNOWN	SYBR	None	29.5627		9.07313	-0.46013	0.46013	1.37567	1.5566	0.174617		1.56	0.17	±	1.56±0.17
HUH7-SI-2	mir-3135a	UNKNOWN	SYBR	None	29.3721		8.88249	-0.650767	0.650767	1.57
HUH7-SI-2	mir-3135a	UNKNOWN	SYBR	None	29.237		8.74739	-0.785867	0.785867	1.72413
HUH7-SI-2	U6	UNKNOWN	SYBR	None	20.5539	20.4896
HUH7-SI-2	U6	UNKNOWN	SYBR	None	20.372
HUH7-SI-2	U6	UNKNOWN	SYBR	None	20.5429

## Sheet: mir-642a-3p
							11.7195
Sample Name	Target Name	Task	Reporter	Quencher	Cт	GAPDH mean（ct）	ΔCT	ΔΔCT	minus ΔΔCT	2-ΔΔCT	2-ΔΔCT Mean	Ct SD
HUH7-SI-NC	mir-642a-3p	UNKNOWN	SYBR	None	32.5131		11.5505	-0.168929	0.168929	1.12422	1.0059	0.13157		1.01	0.13	±	1.01±0.13
HUH7-SI-NC	mir-642a-3p	UNKNOWN	SYBR	None	32.6404		11.6779	-0.0416125	0.0416125	1.02926
HUH7-SI-NC	mir-642a-3p	UNKNOWN	SYBR	None	32.8926		11.93	0.210541	-0.210541	0.864213
HUH7-SI-NC	U6	UNKNOWN	SYBR	None	20.615	20.9626
HUH7-SI-NC	U6	UNKNOWN	SYBR	None	21.0816
HUH7-SI-NC	U6	UNKNOWN	SYBR	None	21.1912
HUH7-SI-2	mir-642a-3p	UNKNOWN	SYBR	None	30.359		9.86943	-1.85004	1.85004	3.60509	3.24287	0.444635		3.24	0.44	±	3.24±0.44
HUH7-SI-2	mir-642a-3p	UNKNOWN	SYBR	None	30.4534		9.96377	-1.75569	1.75569	3.37688
HUH7-SI-2	mir-642a-3p	UNKNOWN	SYBR	None	30.7514		10.2618	-1.45767	1.45767	2.74665
HUH7-SI-2	U6	UNKNOWN	SYBR	None	20.5539	20.4896
HUH7-SI-2	U6	UNKNOWN	SYBR	None	20.372
HUH7-SI-2	U6	UNKNOWN	SYBR	None	20.5429
