# Supplementary material for: CAF-derived miR-642a-3p supports migration, invasion, and EMT of hepatocellular carcinoma cells by targeting SERPINE1
Source: PeerJ. 2024 Nov 11;12:e18428. doi: 10.7717/peerj.18428 (PMC11562775; doi:10.7717/peerj.18428)
Supplement: Supplemental Information 7 [file peerj-12-18428-s007.xls]

## Sheet: Figure 3A
							8.77124
Sample Name	Target Name	Task	Reporter	Quencher	Cт	GAPDH mean（ct）	ΔCT	ΔΔCT	minus ΔΔCT	2-ΔΔCT	2-ΔΔCT Mean	Ct SD
HUH7-mimics-NC	miR-642-3P	UNKNOWN	SYBR	None	28.7204		8.86162	0.0903784	-0.0903784	0.939276	1.00425	0.115463		1	0.12	±	1±0.12
HUH7-mimics-NC	miR-642-3P	UNKNOWN	SYBR	None	28.4441		8.5853	-0.185941	0.185941	1.13756
HUH7-mimics-NC	miR-642-3P	UNKNOWN	SYBR	None	28.7256		8.86681	0.0955626	-0.0955626	0.935907
HUH7-mimics-NC	U6	UNKNOWN	SYBR	None	19.8604	19.8588
HUH7-mimics-NC	U6	UNKNOWN	SYBR	None	19.9373
HUH7-mimics-NC	U6	UNKNOWN	SYBR	None	19.7786
HUH7-mimics	miR-642-3P	UNKNOWN	SYBR	None	12.6797		-7.10547	-15.8767	15.8767	60168.3	60889.8	1931.54		60889.8	1931.54	±	60889.81±1931.54
HUH7-mimics	miR-642-3P	UNKNOWN	SYBR	None	12.6977		-7.08749	-15.8587	15.8587	59422.9
HUH7-mimics	miR-642-3P	UNKNOWN	SYBR	None	12.6115		-7.17361	-15.9449	15.9449	63078.2
HUH7-mimics	U6	UNKNOWN	SYBR	None	19.6009	19.7851
HUH7-mimics	U6	UNKNOWN	SYBR	None	19.7906
HUH7-mimics	U6	UNKNOWN	SYBR	None	19.9639
HUH7-inhibitor-NC	miR-642-3P	UNKNOWN	SYBR	None	28.2905		8.79953	0.0282869	-0.0282869	0.980584	0.963293	0.0475564		0.96	0.05	±	0.96±0.05
HUH7-inhibitor-NC	miR-642-3P	UNKNOWN	SYBR	None	28.2625		8.77155	0.000309881	-0.000309881	0.999785
HUH7-inhibitor-NC	miR-642-3P	UNKNOWN	SYBR	None	28.399		8.90808	0.136838	-0.136838	0.90951
HUH7-inhibitor-NC	U6	UNKNOWN	SYBR	None	19.6793	19.491
HUH7-inhibitor-NC	U6	UNKNOWN	SYBR	None	19.303
HUH7-inhibitor-NC	U6	UNKNOWN	SYBR	None	19.4906
HUH7-inhibitor	miR-642-3P	UNKNOWN	SYBR	None	29.2678		10.2463	1.47508	-1.47508	0.359714	0.364632	0.00747669		0.36	0.01	±	0.36±0.01
HUH7-inhibitor	miR-642-3P	UNKNOWN	SYBR	None	29.2628		10.2414	1.47015	-1.47015	0.360945
HUH7-inhibitor	miR-642-3P	UNKNOWN	SYBR	None	29.2145		10.1931	1.42184	-1.42184	0.373236
HUH7-inhibitor	U6	UNKNOWN	SYBR	None	19.1475	19.0214
HUH7-inhibitor	U6	UNKNOWN	SYBR	None	18.8818
HUH7-inhibitor	U6	UNKNOWN	SYBR	None	19.035

## Sheet: Figure 3B
							6.10361
Sample Name	Target Name	Task	Reporter	Quencher	Cт	GAPDH mean（ct）	ΔCT	ΔΔCT	minus ΔΔCT	2-ΔΔCT	2-ΔΔCT Mean	Ct SD
HUH7-mimics-NC	SERPINE1	UNKNOWN	SYBR	None	22.9233		5.90235	-0.201259	0.201259	1.1497	1.00719	0.146351		1.01	0.15	±	1.01±0.15
HUH7-mimics-NC	SERPINE1	UNKNOWN	SYBR	None	23.3467		6.32577	0.222161	-0.222161	0.85728
HUH7-mimics-NC	SERPINE1	UNKNOWN	SYBR	None	23.1036		6.08271	-0.0209021	0.0209021	1.01459
HUH7-mimics-NC	GAPDH	UNKNOWN	SYBR	None	17.0136	17.0209
HUH7-mimics-NC	GAPDH	UNKNOWN	SYBR	None	16.9427
HUH7-mimics-NC	GAPDH	UNKNOWN	SYBR	None	17.1065
HUH7-mimics	SERPINE1	UNKNOWN	SYBR	None	24.9489		7.30962	1.20601	-1.20601	0.433466	0.46279	0.0267875		0.46	0.03	±	0.46±0.03
HUH7-mimics	SERPINE1	UNKNOWN	SYBR	None	24.8355		7.19616	1.09255	-1.09255	0.468931
HUH7-mimics	SERPINE1	UNKNOWN	SYBR	None	24.784		7.14466	1.04105	-1.04105	0.485975
HUH7-mimics	GAPDH	UNKNOWN	SYBR	None	17.8441	17.6393
HUH7-mimics	GAPDH	UNKNOWN	SYBR	None	17.4217
HUH7-mimics	GAPDH	UNKNOWN	SYBR	None	17.6522
HUH7-inhibitor-NC	SERPINE1	UNKNOWN	SYBR	None	22.4816		6.10926	0.00565198	-0.00565198	0.99609	1.00444	0.0468431		1	0.05	±	1±0.05
HUH7-inhibitor-NC	SERPINE1	UNKNOWN	SYBR	None	22.5314		6.159	0.055388	-0.055388	0.962336
HUH7-inhibitor-NC	SERPINE1	UNKNOWN	SYBR	None	22.3989		6.02651	-0.0771041	0.0771041	1.0549
HUH7-inhibitor-NC	GAPDH	UNKNOWN	SYBR	None	16.3119	16.3724
HUH7-inhibitor-NC	GAPDH	UNKNOWN	SYBR	None	16.2568
HUH7-inhibitor-NC	GAPDH	UNKNOWN	SYBR	None	16.5484
HUH7-inhibitor	SERPINE1	UNKNOWN	SYBR	None	23.2846		5.36628	-0.737329	0.737329	1.66709	1.7901	0.111666		1.79	0.11	±	1.79±0.11
HUH7-inhibitor	SERPINE1	UNKNOWN	SYBR	None	23.1595		5.24114	-0.862468	0.862468	1.81815
HUH7-inhibitor	SERPINE1	UNKNOWN	SYBR	None	23.1073		5.18899	-0.91462	0.91462	1.88507
HUH7-inhibitor	GAPDH	UNKNOWN	SYBR	None	17.9288	17.9184
HUH7-inhibitor	GAPDH	UNKNOWN	SYBR	None	17.8571
HUH7-inhibitor	GAPDH	UNKNOWN	SYBR	None	17.9691
