# Supplementary material for: CAF-derived miR-642a-3p supports migration, invasion, and EMT of hepatocellular carcinoma cells by targeting SERPINE1
Source: PeerJ. 2024 Nov 11;12:e18428. doi: 10.7717/peerj.18428 (PMC11562775; doi:10.7717/peerj.18428)
Supplement: Supplemental Information 11 [file peerj-12-18428-s011.xlsx]

## Sheet: SERPINE1
							5.68867
Sample Name	Target Name	Task	Reporter	Quencher	Cт	GAPDH mean（ct）	ΔCT	ΔΔCT	minus ΔΔCT	2-ΔΔCT	2-ΔΔCT Mean	Ct SD
AAV-NC-1	SERPINE1	UNKNOWN	SYBR	None	28.3306		5.59575	-0.0929157	0.0929157	1.06652	1.00667	0.138212		0.965127	0.0825247		0.97	0.08	±	0.97±0.08
AAV-NC-1	SERPINE1	UNKNOWN	SYBR	None	28.2797		5.54478	-0.143884	0.143884	1.10488
AAV-NC-1	SERPINE1	UNKNOWN	SYBR	None	28.6604		5.92547	0.2368	-0.2368	0.848626
AAV-NC-1	GAPDH	UNKNOWN	SYBR	None	22.8061	22.7349
AAV-NC-1	GAPDH	UNKNOWN	SYBR	None	22.7457
AAV-NC-1	GAPDH	UNKNOWN	SYBR	None	22.6529
AAV-NC-2	SERPINE1	UNKNOWN	SYBR	None	29.164		5.6822	-0.00646985	0.00646985	1.00449	0.966116	0.0480883
AAV-NC-2	SERPINE1	UNKNOWN	SYBR	None	29.3031		5.82129	0.13262	-0.13262	0.912174
AAV-NC-2	SERPINE1	UNKNOWN	SYBR	None	29.1971		5.71534	0.0266741	-0.0266741	0.981681
AAV-NC-2	GAPDH	UNKNOWN	SYBR	None	23.4213	23.4818
AAV-NC-2	GAPDH	UNKNOWN	SYBR	None	23.553
AAV-NC-2	GAPDH	UNKNOWN	SYBR	None	23.4711
AAV-NC-3	SERPINE1	UNKNOWN	SYBR	None	29.31		5.80017	0.1115	-0.1115	0.925625	0.922591	0.0228381
AAV-NC-3	SERPINE1	UNKNOWN	SYBR	None	29.3531		5.84326	0.154591	-0.154591	0.898387
AAV-NC-3	SERPINE1	UNKNOWN	SYBR	None	29.282		5.77218	0.0835083	-0.0835083	0.94376
AAV-NC-3	GAPDH	UNKNOWN	SYBR	None	23.4128	23.5098
AAV-NC-3	GAPDH	UNKNOWN	SYBR	None	23.5937
AAV-NC-3	GAPDH	UNKNOWN	SYBR	None	23.523
AAV-miRNA-1	SERPINE1	UNKNOWN	SYBR	None	27.2779		4.00825	-1.68042	1.68042	3.2052	2.84731	0.330711		2.68349	0.264016		2.68	0.26	±	2.68±0.26
AAV-miRNA-1	SERPINE1	UNKNOWN	SYBR	None	27.6061		4.33646	-1.35221	1.35221	2.55302
AAV-miRNA-1	SERPINE1	UNKNOWN	SYBR	None	27.4813		4.21167	-1.477	1.477	2.7837
AAV-miRNA-1	GAPDH	UNKNOWN	SYBR	None	23.1594	23.2697
AAV-miRNA-1	GAPDH	UNKNOWN	SYBR	None	23.3307
AAV-miRNA-1	GAPDH	UNKNOWN	SYBR	None	23.3189
AAV-miRNA-2	SERPINE1	UNKNOWN	SYBR	None	26.9381		4.32862	-1.36005	1.36005	2.56694	2.57381	0.019341
AAV-miRNA-2	SERPINE1	UNKNOWN	SYBR	None	26.9427		4.33318	-1.35549	1.35549	2.55884
AAV-miRNA-2	SERPINE1	UNKNOWN	SYBR	None	26.9221		4.31257	-1.37609	1.37609	2.59565
AAV-miRNA-2	GAPDH	UNKNOWN	SYBR	None	22.6968	22.6095
AAV-miRNA-2	GAPDH	UNKNOWN	SYBR	None	22.4998
AAV-miRNA-2	GAPDH	UNKNOWN	SYBR	None	22.6318
AAV-miRNA-3	SERPINE1	UNKNOWN	SYBR	None	26.6614		4.33699	-1.35168	1.35168	2.5521	2.62934	0.326156
AAV-miRNA-3	SERPINE1	UNKNOWN	SYBR	None	26.4343		4.10988	-1.57879	1.57879	2.98719
AAV-miRNA-3	SERPINE1	UNKNOWN	SYBR	None	26.7812		4.45678	-1.23189	1.23189	2.34875
AAV-miRNA-3	GAPDH	UNKNOWN	SYBR	None	22.2477	22.3244
AAV-miRNA-3	GAPDH	UNKNOWN	SYBR	None	22.3165
AAV-miRNA-3	GAPDH	UNKNOWN	SYBR	None	22.4089

## Sheet: mir-642a-3p
							8.39912
Sample Name	Target Name	Task	Reporter	Quencher	Cт	GAPDH mean（ct）	ΔCT	ΔΔCT	minus ΔΔCT	2-ΔΔCT	2-ΔΔCT Mean	Ct SD
AAV-NC-1	mir-642a-3p	UNKNOWN	SYBR	None	27.1159		8.25787	-0.141247	0.141247	1.10286	1.00291	0.0940184		0.995409	0.084964		1	0.08	±	1±0.08
AAV-NC-1	mir-642a-3p	UNKNOWN	SYBR	None	27.3834		8.52534	0.126216	-0.126216	0.916232
AAV-NC-1	mir-642a-3p	UNKNOWN	SYBR	None	27.2722		8.41415	0.0150308	-0.0150308	0.989636
AAV-NC-1	U6	UNKNOWN	SYBR	None	18.9586	18.858
AAV-NC-1	U6	UNKNOWN	SYBR	None	18.931
AAV-NC-1	U6	UNKNOWN	SYBR	None	18.6845
AAV-NC-2	mir-642a-3p	UNKNOWN	SYBR	None	28.9073		8.18781	-0.211307	0.211307	1.15774	1.0028	0.135041
AAV-NC-2	mir-642a-3p	UNKNOWN	SYBR	None	29.2069		8.48749	0.0883723	-0.0883723	0.940583
AAV-NC-2	mir-642a-3p	UNKNOWN	SYBR	None	29.2545		8.53505	0.135926	-0.135926	0.910085
AAV-NC-2	U6	UNKNOWN	SYBR	None	20.7187	20.7194
AAV-NC-2	U6	UNKNOWN	SYBR	None	20.7807
AAV-NC-2	U6	UNKNOWN	SYBR	None	20.6589
AAV-NC-3	mir-642a-3p	UNKNOWN	SYBR	None	28.8493		8.44839	0.049271	-0.049271	0.966425	0.980516	0.0360682
AAV-NC-3	mir-642a-3p	UNKNOWN	SYBR	None	28.7693		8.36843	-0.0306939	0.0306939	1.0215
AAV-NC-3	mir-642a-3p	UNKNOWN	SYBR	None	28.8685		8.46763	0.0685111	-0.0685111	0.953622
AAV-NC-3	U6	UNKNOWN	SYBR	None	20.2498	20.4009
AAV-NC-3	U6	UNKNOWN	SYBR	None	20.4065
AAV-NC-3	U6	UNKNOWN	SYBR	None	20.5464
AAV-miRNA-1	mir-642a-3p	UNKNOWN	SYBR	None	30.7083		10.3826	1.98344	-1.98344	0.252885	0.295194	0.036672		0.346155	0.049755		0.35	0.05	±	0.35±0.05
AAV-miRNA-1	mir-642a-3p	UNKNOWN	SYBR	None	30.3922		10.0665	1.66736	-1.66736	0.314829
AAV-miRNA-1	mir-642a-3p	UNKNOWN	SYBR	None	30.3784		10.0526	1.6535	-1.6535	0.317868
AAV-miRNA-1	U6	UNKNOWN	SYBR	None	20.2071	20.3258
AAV-miRNA-1	U6	UNKNOWN	SYBR	None	20.4373
AAV-miRNA-1	U6	UNKNOWN	SYBR	None	20.3328
AAV-miRNA-2	mir-642a-3p	UNKNOWN	SYBR	None	30.2074		9.8853	1.48618	-1.48618	0.356956	0.358807	0.0446658
AAV-miRNA-2	mir-642a-3p	UNKNOWN	SYBR	None	30.3873		10.0653	1.66614	-1.66614	0.315096
AAV-miRNA-2	mir-642a-3p	UNKNOWN	SYBR	None	30.0274		9.70537	1.30625	-1.30625	0.40437
AAV-miRNA-2	U6	UNKNOWN	SYBR	None	20.4459	20.3221
AAV-miRNA-2	U6	UNKNOWN	SYBR	None	20.3622
AAV-miRNA-2	U6	UNKNOWN	SYBR	None	20.158
AAV-miRNA-3	mir-642a-3p	UNKNOWN	SYBR	None	30.2039		9.71475	1.31563	-1.31563	0.401751	0.384462	0.0150195
AAV-miRNA-3	mir-642a-3p	UNKNOWN	SYBR	None	30.2956		9.80644	1.40732	-1.40732	0.377011
AAV-miRNA-3	mir-642a-3p	UNKNOWN	SYBR	None	30.3047		9.8156	1.41648	-1.41648	0.374626
AAV-miRNA-3	U6	UNKNOWN	SYBR	None	20.5549	20.4891
AAV-miRNA-3	U6	UNKNOWN	SYBR	None	20.4343
AAV-miRNA-3	U6	UNKNOWN	SYBR	None	20.4782
